# Supplementary material for: Density Functional Calculation and Evaluation of the Spectroscopic Properties and Luminescent Material Application Potential of the N-Heterocyclic Platinum(II) Tetracarbene Complexes
Source: MDPI journal article supplement (doi:10.3390/molecules29020524), 2024-01-20
Supplement: s1 [file s1]

# Density Functional Calculation and Evaluation of the Spectroscopic Properties and Luminescent Material Application Potential of the N-Heterocyclic Platinum(II) Tetracarbene Complexes

Bao-Hui Xia <sup>1</sup>, Yin-Si Ma <sup>1</sup> and Fu-Quan Bai <sup>1,2,\*</sup>

- <sup>1</sup> International Joint Research Laboratory of Nano-Micro Architecture Chemistry, College of Chemistry, Jilin University, Changchun 130023, China; w\_lei10@mails.jlu.edu.cn (B.-H.X.); yangyong07@mails.jlu.edu.cn (Y.-S.M.)  
<sup>2</sup> State Key Laboratory of Luminescent Materials and Devices, South China University of Technology, Guangzhou 510640, China  
\* Correspondence: baifq@jlu.edu.cn; Tel.: +86-431-88498966

## THE TABLE OF CONTENTS

|                                                                                                                                                                                   |   |
|-----------------------------------------------------------------------------------------------------------------------------------------------------------------------------------|---|
| <b>Table S1</b> Molecular orbital compositions (%) in the ground state for [Pt(meim) <sub>2</sub> ] <sup>2+</sup> .....                                                           | 2 |
| <b>Table S2</b> Absorptions of [Pt(meim) <sub>2</sub> ] <sup>2+</sup> according to the TD-DFT calculations. ....                                                                  | 2 |
| <b>Table S3</b> Molecular orbital compositions (%) in the lowest-lying triplet excited state for [Pt(meim) <sub>2</sub> ] <sup>2+</sup> .....                                     | 3 |
| <b>Table S4</b> Molecular orbital compositions (%) in the dd excited state for [Pt(meim) <sub>2</sub> ] <sup>2+</sup> .....                                                       | 3 |
| <b>Fig. S1</b> Several important molecular orbitals of [Pt(meim) <sub>2</sub> ] <sup>2+</sup> in the ground state.....                                                            | 4 |
| <b>Fig. S2</b> Potential energy curves of ground state (S <sub>0</sub> ) and the lowest triplet state (T <sub>1</sub> ) involving the spin density.....                           | 4 |
| <b>Fig. S3</b> The HSOMO and HSOMO-1 molecular orbitals of [Pt(meim) <sub>2</sub> ] <sup>2+</sup> and [Pt(cyim) <sub>2</sub> ] <sup>2+</sup> in the T <sub>1</sub> -dd state..... | 5 |

**Table S1.** Molecular orbital compositions (%) in the ground state for  $[\text{Pt}(\text{meim})_2]^{2+}$ .

| Orbital                 | Energy (eV) | Orbital populations (%) |         |          |          |               |          | N-Carbene | Bond type           |
|-------------------------|-------------|-------------------------|---------|----------|----------|---------------|----------|-----------|---------------------|
|                         |             | Pt                      |         |          |          |               |          |           |                     |
|                         |             | $\Sigma_{s,p}$          | $d_z^2$ | $d_{xz}$ | $d_{yz}$ | $d_{x^2-y^2}$ | $d_{xy}$ |           |                     |
| 107 (31a <sub>g</sub> ) | -5.1688     | 0.1                     | 0.2     |          | 0.2      |               |          | 99.4      | $\pi^*$             |
| 106 (24b <sub>g</sub> ) | -5.3634     |                         |         | 0.3      |          | 15.3          |          | 83.7      | $\pi^*+d_{x^2-y^2}$ |
| 105 (24a <sub>u</sub> ) | -5.5544     | 1.0                     |         |          |          |               |          | 98.6      | $\pi^*$             |
| 104 (28b <sub>u</sub> ) | -5.7101     | 0.2                     | 1.3     | 3.2      | 4.4      | 0.2           | 4.4      | 90.7      | $\pi^*$             |
| 103 (27b <sub>u</sub> ) | -7.2279     | 20.0 (p)                |         |          |          |               |          | 79.8      | $\pi^*+p$           |
| HOMO–LUMO Energy Gap    |             |                         |         |          |          |               |          |           |                     |
| 102 (30a <sub>g</sub> ) | -12.1135    | 0.2                     | 1.5     | 11.2     | 20.2     | 1.1           | 0.1      | 65.7      | $\pi+d_{yz}+d_{xz}$ |
| 101 (23b <sub>g</sub> ) | -12.1620    |                         |         |          | 1.3      | 0.3           | 24.4     | 74.0      | $\pi+d_{xy}$        |
| 100 (23a <sub>u</sub> ) | -12.5377    | 0.3                     |         |          |          |               |          | 99.6      | $\pi$               |
| 99 (28a <sub>g</sub> )  | -12.6983    | 14.2 (s)                | 55.8    | 18.6     | 1.6      | 0.2           |          | 5.6       | $d_z^2$ , s, p      |
| 96 (22b <sub>g</sub> )  | -13.7647    | 1.4                     |         |          |          |               |          | 98.6      | $\pi$               |

**Table S2.** Absorptions of  $[\text{Pt}(\text{meim})_2]^{2+}$  according to the TD-DFT calculations. *f*: oscillator strength.

| Transition                          |         | $\psi_o \rightarrow \psi_v$ (CI coeff)    | $E_{\text{ver,nm}}$ (eV) | <i>f</i> | Assignment                    |
|-------------------------------------|---------|-------------------------------------------|--------------------------|----------|-------------------------------|
| X <sup>1</sup> Ag→A <sup>1</sup> Bu | H→L     | 30a <sub>g</sub> →27b <sub>u</sub> (0.69) | 302.2 (4.10)             | 0.2182   | MLCT/ $\pi \rightarrow \pi^*$ |
| X <sup>1</sup> Ag→B <sup>1</sup> Au | H-1→L   | 23b <sub>g</sub> →27b <sub>u</sub> (0.69) | 294.6 (4.21)             | 0.1139   | MLCT/ $\pi \rightarrow \pi^*$ |
| X <sup>1</sup> Ag→C <sup>1</sup> Bu | H-3→L+1 | 28a <sub>g</sub> →28b <sub>u</sub> (0.68) | 271.7 (4.56)             | 0.1444   | MLCT                          |
| X <sup>1</sup> Ag→D <sup>1</sup> Au | H→L+2   | 30a <sub>g</sub> →24a <sub>u</sub> (0.68) | 217.8 (5.70)             | 0.1238   | $\pi \rightarrow \pi^*$ /MLCT |
| X <sup>1</sup> Ag→E <sup>1</sup> Bu | H-1→L+2 | 23b <sub>g</sub> →24a <sub>u</sub> (0.68) | 210.0 (5.90)             | 0.1906   | $\pi \rightarrow \pi^*$       |
|                                     | H-6→L+2 | 22b <sub>g</sub> →24a <sub>u</sub> (0.10) |                          |          |                               |

**Table S3.** Molecular orbital compositions (%) in the lowest-lying triplet excited state for  $[\text{Pt}(\text{meim})_2]^{2+}$ .

| $\alpha$                   |             |                                                 |           | $\beta$                    |             |                                                              |           |
|----------------------------|-------------|-------------------------------------------------|-----------|----------------------------|-------------|--------------------------------------------------------------|-----------|
| Orbital                    | Energy (eV) | Orbital populations (%)                         |           | Orbital                    | Energy (eV) | Orbital populations (%)                                      |           |
|                            |             | Pt                                              | N-Carbene |                            |             | Pt                                                           | N-Carbene |
| 107 (31a <sub>g</sub> )--V | -5.3648     |                                                 | 99.4      | 105 (30a <sub>g</sub> )--V | -5.5569     |                                                              | 89.9      |
| 106 (24b <sub>g</sub> )--V | -5.7686     | 9.0 (d <sub>x<sup>2</sup>-y<sup>2</sup></sub> ) | 87.8      | 104 (24a <sub>u</sub> )--V | -5.5626     |                                                              | 99.1      |
| 105 (24a <sub>u</sub> )--V | -5.9261     |                                                 | 99.3      | 103 (28b <sub>u</sub> )--V | -7.2938     | 18.1 (p)                                                     | 81.7      |
| 104 (30a <sub>g</sub> )--V | -6.1422     |                                                 | 90.4      | 102 (29a <sub>g</sub> )--V | -11.0743    | 22.5 (d <sub>yz</sub> )                                      | 65.0      |
| HOMO–LUMO Energy Gap       |             |                                                 |           | HOMO–LUMO Energy Gap       |             |                                                              |           |
| 103 (28b <sub>u</sub> )--O | -8.5167     | 20.0 (p)                                        | 80.6      | 101 (23b <sub>g</sub> )--O | -11.9244    | 17.2 (d <sub>xy</sub> )                                      | 81.9      |
| 102 (23b <sub>g</sub> )--O | -12.3277    | 19.8 (d <sub>xy</sub> )                         | 79.1      | 100 (23a <sub>u</sub> )--O | -12.2400    |                                                              | 99.6      |
| 101 (29a <sub>g</sub> )--O | -12.3938    | 15.2 (d <sub>yz</sub> )                         | 74.3      | 99 (27b <sub>u</sub> )--O  | -12.5328    |                                                              | 98.0      |
| 100 (23a <sub>u</sub> )--O | -12.6877    |                                                 | 99.6      | 98 (28a <sub>g</sub> )--O  | -12.9320    | 55.4 (d <sub>z</sub> <sup>2</sup> ); 22.8 (d <sub>xz</sub> ) | 6.1       |

**Table S4.** Molecular orbital compositions (%) in the dd excited state for  $[\text{Pt}(\text{meim})_2]^{2+}$ .

| $\alpha$                   |             |                                                  |           | $\beta$                    |             |                                                  |           |
|----------------------------|-------------|--------------------------------------------------|-----------|----------------------------|-------------|--------------------------------------------------|-----------|
| Orbital                    | Energy (eV) | Orbital populations (%)                          |           | Orbital                    | Energy (eV) | Orbital populations (%)                          |           |
|                            |             | Pt                                               | N-Carbene |                            |             | Pt                                               | N-Carbene |
| 107 (25b <sub>g</sub> )--V | -5.1199     |                                                  | 96.8      | 105 (30a <sub>g</sub> )--V | -5.7030     |                                                  | 93.2      |
| 106 (24a <sub>u</sub> )--V | -5.4113     |                                                  | 97.0      | 104 (24b <sub>g</sub> )--V | -6.4758     | 29.3 (d <sub>x<sup>2</sup>-y<sup>2</sup></sub> ) | 70.1      |
| 105 (30a <sub>g</sub> )--V | -5.9683     |                                                  | 93.7      | 103 (28b <sub>u</sub> )--V | -6.9928     | 24.2 (p)                                         | 75.1      |
| 104 (28b <sub>u</sub> )--V | -7.1164     | 24.8 (p)                                         | 75.1      | 102 (29a <sub>g</sub> )--V | -10.6161    | 38.5 (d <sub>xz</sub> ); 21.5 (d <sub>yz</sub> ) | 20.2      |
| HOMO–LUMO Energy Gap       |             |                                                  |           | HOMO–LUMO Energy Gap       |             |                                                  |           |
| 103 (24b <sub>g</sub> )--O | -9.1592     | 32.2 (d <sub>x<sup>2</sup>-y<sup>2</sup></sub> ) | 66.1      | 101 (23b <sub>g</sub> )--O | -12.1407    | 14.8 (d <sub>xy</sub> )                          | 84.5      |
| 102 (23b <sub>g</sub> )--O | -12.3187    |                                                  | 89.6      | 100 (23a <sub>u</sub> )--O | -12.3032    |                                                  | 99.4      |
| 101 (29a <sub>g</sub> )--O | -12.4033    | 8.0 (d <sub>yz</sub> )                           | 81.6      | 99 (28a <sub>g</sub> )--O  | -12.4248    | 38.2 (d <sub>z</sub> <sup>2</sup> )              | 46.7      |
| 100 (23a <sub>u</sub> )--O | -12.4373    |                                                  | 99.5      | 98 (27b <sub>u</sub> )--O  | -12.5367    |                                                  | 98.4      |

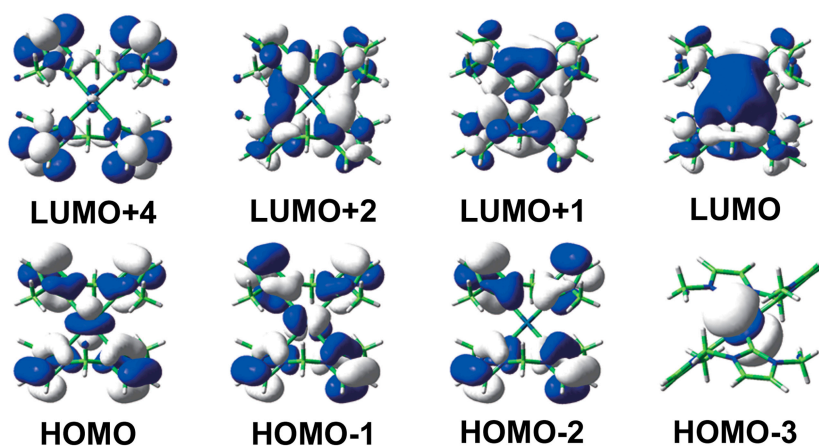

**Figure S1.** Several important molecular orbitals of  $[\text{Pt}(\text{meim})_2]^{2+}$  in the ground state.

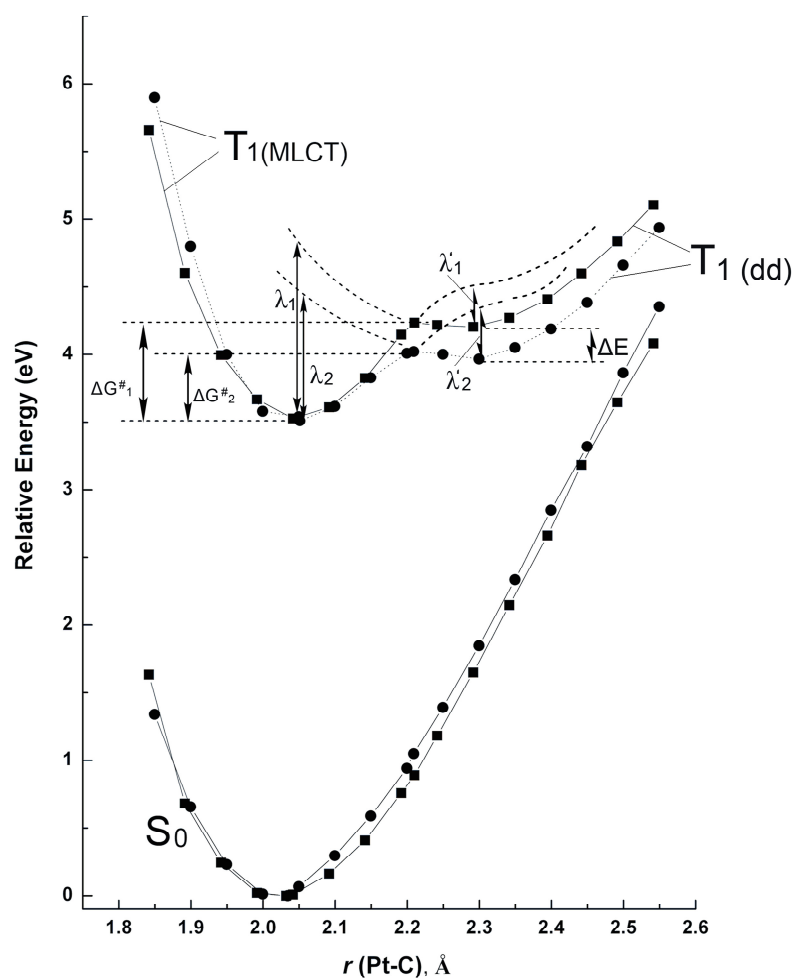

**Figure S2.** Potential energy curves of ground state ( $S_0$ ) and the lowest triplet state ( $T_1$ ) involving the spin density. (■:  $[\text{Pt}(\text{meim})_2]^{2+}$ ; ●:  $[\text{Pt}(\text{cyim})_2]^{2+}$ ). Where  $\Delta G^\#$  is the activation energy barrier,  $\lambda$  is the reorganization energy, and  $\Delta E$  is the energy difference between two dd states. The zero-point of the energy scale is set to the global minima of the  $S_0$ -PECs, and ignore the same 0-0 transition energies.  $\Delta G^\#_1 - \Delta G^\#_2 = 0.11$  eV.  $\Delta E = 0.24$  eV.

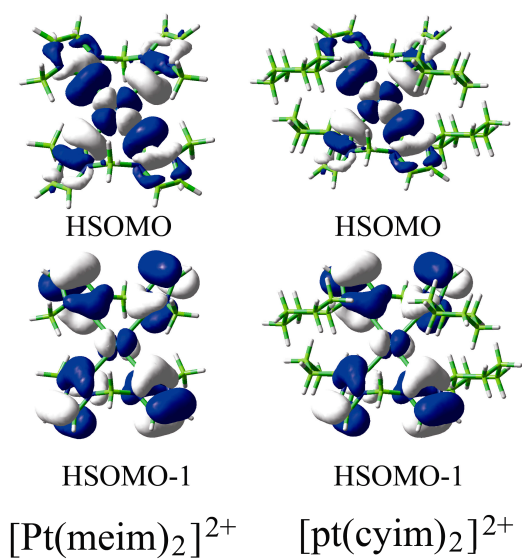

**Figure S3.** The HSOMO and HSOMO-1 molecular orbitals of  $[\text{Pt}(\text{meim})_2]^{2+}$  and  $[\text{Pt}(\text{cyim})_2]^{2+}$  in the T1-dd state.
